# Supplementary material for: Atherosclerotic patients with diabetes mellitus may break through the threshold of healthy TMAO levels formed by long-term statins therapy
Source: PubMed Central journal article supplement — Heliyon. 2023 Feb 11;9(2):e13657. doi: 10.1016/j.heliyon.2023.e13657 (PMC9984437; doi:10.1016/j.heliyon.2023.e13657), 2023-02-11
Supplement: mmc2.pdf [file mmc2.pdf]

# Supporting Information

## Atherosclerotic patients with diabetes mellitus may break through the threshold of healthy TMAO levels formed by long-term statins therapy

Hao Liang,<sup>1</sup> Anqi Yu,<sup>2</sup> Zheng Wang,<sup>2</sup> Na Zhang,<sup>1</sup> Qingsong Wang,<sup>1</sup> Haichao Gao,<sup>1</sup> Junhui Gao,<sup>2\*</sup> Xinjun Wang,<sup>2,3,4\*</sup> and Hong Wang<sup>1\*</sup>

<sup>1</sup> Department of cardiology, Affiliated Hospital of Chengde Medical University, Chengde 067050, China

<sup>2</sup> Shanghai Biotechan Pharmaceuticals Co., Ltd, Shanghai Zhangjiang Institute of Medical Innovation, Shanghai 201204, China.

<sup>3</sup> Translational Medical Center for Stem Cell Therapy and Institute for Regenerative Medicine, Shanghai East Hospital, Shanghai Key Laboratory of Signaling and Disease Research, School of Life Sciences and Technology, Tongji University, Shanghai 200092, China.

<sup>4</sup> Shanghai Institution of Gut Microbiota Research and Engineering Development, Tenth People's Hospital of Tongji University, Tongji University School of Medicine, Shanghai 200072, China.

\* Corresponding to Xinjun Wang (xjwang16@fudan.edu.cn), Hong Wang (wanghong659@163.com) and Junhui Gao (jhgao68@163.com).

### Contents

|                                                                                                   |           |
|---------------------------------------------------------------------------------------------------|-----------|
| <b>S1. Spearman correlation between subjects' TMAO level and TIMI flow grade.....</b>             | <b>2</b>  |
| <b>S2. Pearson correlation between diabetic subjects' TMAO level and diabetes biomarkers.....</b> | <b>3</b>  |
| <b>S3. Prevalence of statin use in different subgroups of patients.....</b>                       | <b>4</b>  |
| <b>S4. Medication regimen of patient subjects.....</b>                                            | <b>5</b>  |
| <b>S5. Types and glycemic index in diabetics subjects.....</b>                                    | <b>17</b> |

**S1. Spearman correlation between subjects' TMAO level and TIMI flow grade.**

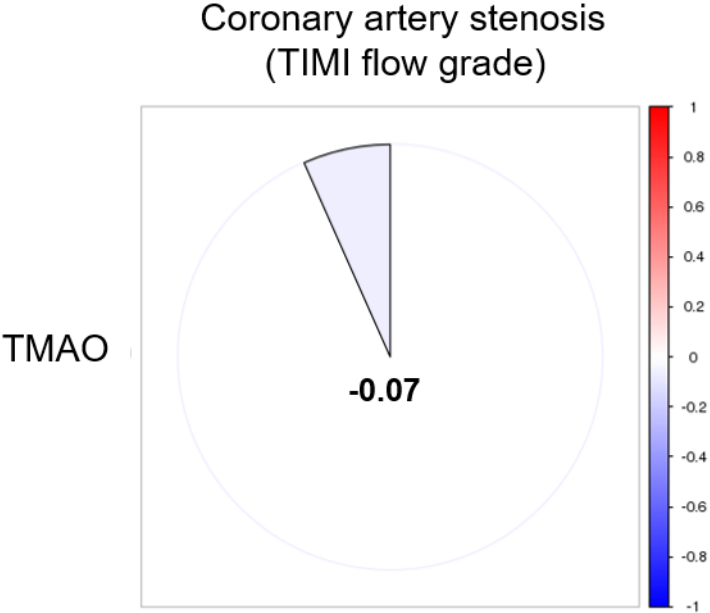

**Figure S1.** Spearman correlation between subjects' TMAO level and TIMI flow grade.

**S2. Pearson correlation between diabetic subjects' TMAO level and diabetes biomarkers.**

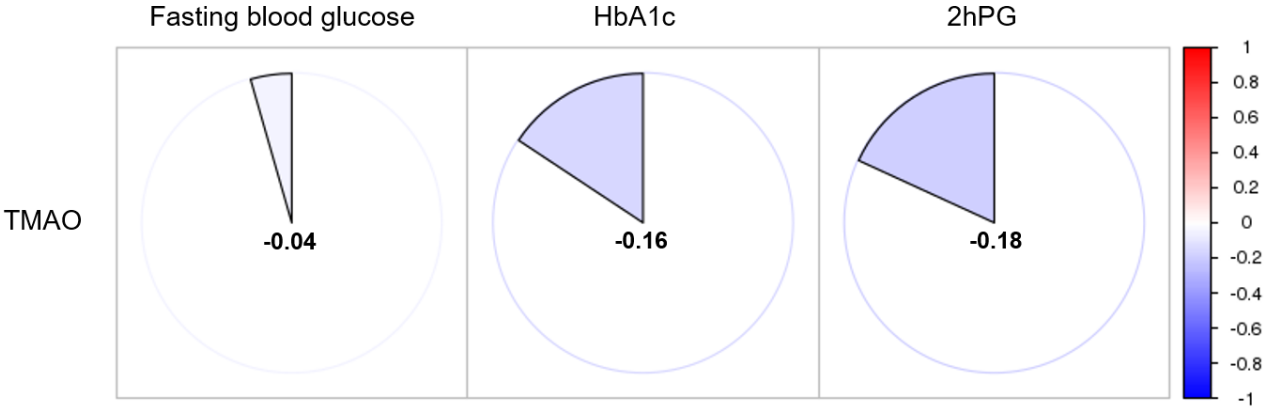

**Figure S2.** Pearson correlation between subjects' TMAO level and diabetes biomarkers.

**S3. Prevalence of statin use in different subgroups of patients.**

**(A)**

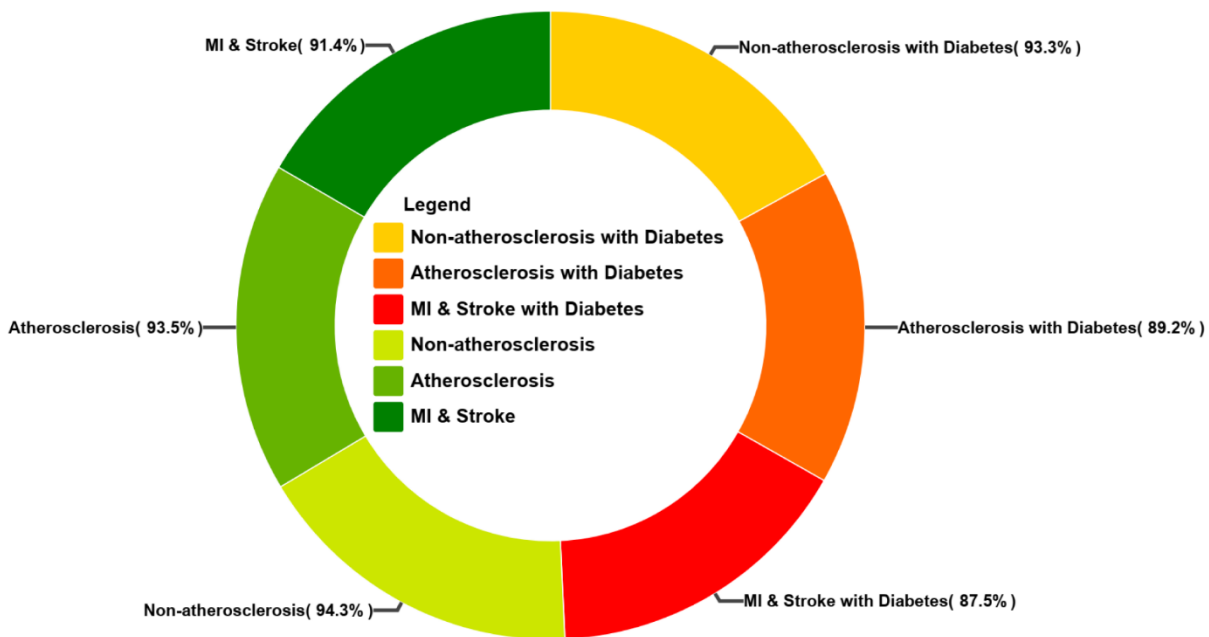

**(B)**

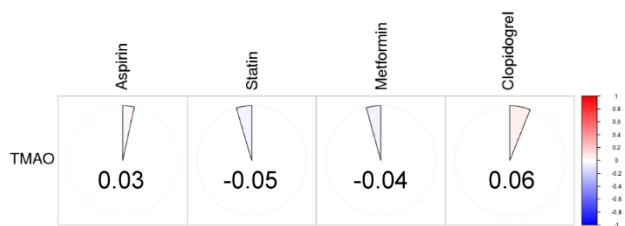

**Figure S3.** (A) Prevalence of statin use in 6 subgroups of patients. (B) Spearman correlation between subjects' TMAO level and their medication regimen.

#### S4. Medication regimen of patient subjects.

**Table S1.** Medication regimen of non-atherosclerosis controls, atherosclerosis patients and MI & stroke patients.

| Patients   | Aspirin*<br>(1=Yes, 2=No) | Statins*<br>(1=Yes, 2=No) | Metformin*<br>(1=Yes, 2=No) | Clopidogrel*<br>(1=Yes, 2=No) |
|------------|---------------------------|---------------------------|-----------------------------|-------------------------------|
| Patient 20 | 1                         | 1                         | 1                           | 1                             |
| Patient 21 | 1                         | 1                         | 2                           | 1                             |
| Patient 22 | 1                         | 1                         | 2                           | 1                             |
| Patient 23 | 1                         | 1                         | 2                           | 2                             |
| Patient 24 | 1                         | 1                         | 1                           | 1                             |
| Patient 25 | 1                         | 1                         | 2                           | 2                             |
| Patient 26 | 1                         | 1                         | 2                           | 1                             |
| Patient 27 | 1                         | 1                         | 2                           | 2                             |
| Patient 28 | 1                         | 1                         | 2                           | 1                             |
| Patient 29 | 1                         | 1                         | 2                           | 1                             |
| Patient 30 | 1                         | 1                         | 2                           | 1                             |
| Patient 31 | 1                         | 1                         | 2                           | 1                             |
| Patient 32 | 1                         | 1                         | 2                           | 1                             |
| Patient 33 | 1                         | 1                         | 2                           | 1                             |
| Patient 34 | 1                         | 1                         | 2                           | 1                             |
| Patient 35 | 2                         | 2                         | 2                           | 2                             |
| Patient 36 | 1                         | 1                         | 2                           | 1                             |
| Patient 37 | 1                         | 1                         | 2                           | 2                             |
| Patient 38 | 1                         | 1                         | 2                           | 2                             |
| Patient 39 | 1                         | 1                         | 1                           | 2                             |
| Patient 40 | 1                         | 1                         | 2                           | 1                             |
| Patient 41 | 1                         | 1                         | 2                           | 1                             |
| Patient 42 | 1                         | 1                         | 2                           | 1                             |
| Patient 43 | 1                         | 1                         | 2                           | 1                             |
| Patient 44 | 2                         | 1                         | 2                           | 2                             |
| Patient 45 | 1                         | 1                         | 2                           | 1                             |

|            |   |   |   |   |
|------------|---|---|---|---|
| Patient 46 | 1 | 1 | 2 | 1 |
| Patient 47 | 1 | 1 | 2 | 1 |
| Patient 48 | 2 | 1 | 2 | 2 |
| Patient 49 | 1 | 1 | 2 | 1 |
| Patient 50 | 1 | 1 | 2 | 1 |
| Patient 51 | 1 | 1 | 2 | 1 |
| Patient 52 | 1 | 1 | 2 | 2 |
| Patient 53 | 1 | 1 | 2 | 1 |
| Patient 54 | 1 | 1 | 2 | 2 |
| Patient 55 | 1 | 1 | 2 | 1 |
| Patient 56 | 1 | 1 | 2 | 1 |
| Patient 57 | 1 | 1 | 2 | 2 |
| Patient 58 | 1 | 1 | 2 | 2 |
| Patient 59 | 1 | 1 | 2 | 1 |
| Patient 60 | 1 | 1 | 2 | 2 |
| Patient 61 | 1 | 1 | 2 | 1 |
| Patient 62 | 1 | 1 | 2 | 1 |
| Patient 63 | 1 | 1 | 2 | 1 |
| Patient 64 | 1 | 1 | 2 | 1 |
| Patient 65 | 1 | 1 | 2 | 1 |
| Patient 66 | 1 | 1 | 2 | 2 |
| Patient 67 | 1 | 1 | 2 | 2 |
| Patient 68 | / | / | / | / |
| Patient 69 | 1 | 1 | 2 | 1 |
| Patient 70 | 1 | 1 | 2 | 1 |
| Patient 71 | 1 | 1 | 2 | 1 |
| Patient 72 | 1 | 1 | 2 | 1 |
| Patient 73 | 1 | 1 | 2 | 1 |
| Patient 74 | 1 | 1 | 2 | 1 |

|             |   |   |   |   |
|-------------|---|---|---|---|
| Patient 75  | 1 | 1 | 2 | 1 |
| Patient 76  | / | / | / | / |
| Patient 77  | 1 | 1 | 1 | 2 |
| Patient 78  | 1 | 1 | 2 | 1 |
| Patient 79  | 1 | 1 | 2 | 1 |
| Patient 80  | 1 | 1 | 2 | 2 |
| Patient 81  | 1 | 1 | 2 | 1 |
| Patient 82  | 1 | 1 | 2 | 2 |
| Patient 83  | 2 | 2 | 2 | 2 |
| Patient 84  | 1 | 1 | 2 | 2 |
| Patient 85  | 1 | 1 | 2 | 1 |
| Patient 86  | 1 | 1 | 2 | 1 |
| Patient 87  | 1 | 1 | 2 | 1 |
| Patient 88  | 1 | 1 | 2 | 1 |
| Patient 89  | 1 | 1 | 2 | 2 |
| Patient 90  | 1 | 1 | 2 | 2 |
| Patient 91  | 1 | 1 | 2 | 1 |
| Patient 92  | 1 | 1 | 2 | 1 |
| Patient 93  | 1 | 1 | 2 | 2 |
| Patient 94  | 2 | 1 | 2 | 1 |
| Patient 95  | 1 | 1 | 1 | 1 |
| Patient 96  | 1 | 1 | 2 | 1 |
| Patient 97  | 1 | 1 | 2 | 1 |
| Patient 98  | 1 | 1 | 2 | 2 |
| Patient 99  | 1 | 1 | 1 | 1 |
| Patient 100 | 1 | 1 | 1 | 1 |
| Patient 101 | 1 | 1 | 2 | 1 |
| Patient 102 | 1 | 1 | 1 | 1 |
| Patient 103 | 1 | 1 | 2 | 1 |

|             |   |   |   |   |
|-------------|---|---|---|---|
| Patient 104 | 1 | 1 | 2 | 1 |
| Patient 105 | 1 | 1 | 2 | 2 |
| Patient 106 | 1 | 1 | 2 | 1 |
| Patient 107 | 1 | 1 | 2 | 1 |
| Patient 108 | 1 | 1 | 2 | 2 |
| Patient 109 | 2 | 1 | 2 | 1 |
| Patient 110 | 1 | 1 | 2 | 1 |
| Patient 111 | 1 | 1 | 2 | 1 |
| Patient 112 | 1 | 1 | 2 | 1 |
| Patient 113 | 1 | 1 | 2 | 2 |
| Patient 114 | 2 | 2 | 2 | 2 |
| Patient 115 | 1 | 1 | 2 | 1 |
| Patient 116 | 1 | 1 | 2 | 2 |
| Patient 117 | 1 | 1 | 2 | 2 |
| Patient 118 | 1 | 1 | 2 | 2 |
| Patient 119 | 1 | 1 | 2 | 2 |
| Patient 120 | 1 | 1 | 2 | 2 |
| Patient 121 | 1 | 1 | 2 | 2 |
| Patient 122 | 2 | 2 | 2 | 2 |
| Patient 123 | 1 | 1 | 2 | 1 |
| Patient 124 | 1 | 1 | 2 | 1 |
| Patient 125 | 1 | 1 | 2 | 1 |
| Patient 126 | 1 | 1 | 2 | 1 |
| Patient 127 | 1 | 1 | 2 | 1 |
| Patient 128 | 1 | 1 | 2 | 1 |
| Patient 129 | 1 | 1 | 2 | 1 |
| Patient 130 | 1 | 1 | 2 | 1 |
| Patient 131 | 1 | 1 | 2 | 1 |
| Patient 132 | 1 | 1 | 2 | 1 |



|             |   |   |   |   |
|-------------|---|---|---|---|
| Patient 133 | 1 | 1 | 2 | 1 |
| Patient 134 | 1 | 1 | 2 | 2 |
| Patient 135 | 2 | 2 | 2 | 2 |
| Patient 136 | 1 | 1 | 2 | 1 |
| Patient 137 | 2 | 1 | 2 | 2 |
| Patient 138 | 1 | 1 | 2 | 1 |
| Patient 139 | 1 | 1 | 2 | 1 |
| Patient 140 | 1 | 1 | 2 | 2 |
| Patient 141 | 1 | 1 | 2 | 2 |
| Patient 142 | 1 | 1 | 2 | 2 |
| Patient 143 | 1 | 1 | 2 | 1 |
| Patient 144 | 1 | 1 | 2 | 1 |
| Patient 145 | 2 | 2 | 1 | 2 |
| Patient 146 | 1 | 1 | 2 | 1 |
| Patient 147 | 2 | 1 | 2 | 1 |
| Patient 148 | 1 | 1 | 2 | 1 |
| Patient 149 | 1 | 1 | 2 | 1 |
| Patient 150 | 1 | 1 | 2 | 1 |
| Patient 151 | 1 | 2 | 2 | 1 |
| Patient 152 | 1 | 1 | 2 | 1 |
| Patient 153 | / | / | / | / |
| Patient 154 | 1 | 1 | 2 | 2 |
| Patient 155 | 1 | 1 | 2 | 2 |
| Patient 156 | 1 | 1 | 2 | 1 |
| Patient 157 | 1 | 1 | 2 | 1 |
| Patient 158 | 1 | 1 | 2 | 1 |
| Patient 159 | 1 | 1 | 2 | 1 |
| Patient 160 | 1 | 1 | 2 | 1 |
| Patient 161 | 1 | 1 | 2 | 2 |

|             |   |   |   |   |
|-------------|---|---|---|---|
| Patient 162 | 1 | 1 | 2 | 1 |
| Patient 163 | 1 | 1 | 2 | 1 |
| Patient 164 | 1 | 1 | 2 | 1 |
| Patient 165 | 1 | 1 | 2 | 1 |
| Patient 166 | 1 | 1 | 1 | 1 |
| Patient 167 | 1 | 1 | 2 | 1 |
| Patient 168 | 1 | 1 | 2 | 2 |
| Patient 169 | 1 | 1 | 2 | 1 |
| Patient 170 | 1 | 1 | 2 | 1 |
| Patient 171 | 1 | 1 | 1 | 2 |
| Patient 172 | 1 | 1 | 2 | 2 |
| Patient 173 | 1 | 1 | 2 | 1 |
| Patient 174 | 1 | 1 | 2 | 2 |
| Patient 175 | 1 | 1 | 2 | 1 |
| Patient 176 | 1 | 1 | 2 | 1 |
| Patient 177 | 1 | 1 | 2 | 1 |
| Patient 178 | 1 | 1 | 2 | 1 |
| Patient 179 | 1 | 1 | 2 | 1 |
| Patient 180 | 1 | 1 | 2 | 1 |
| Patient 181 | 1 | 1 | 2 | 1 |
| Patient 182 | 1 | 1 | 2 | 1 |
| Patient 183 | 2 | 1 | 2 | 2 |
| Patient 184 | 1 | 1 | 2 | 1 |
| Patient 185 | 1 | 1 | 2 | 2 |
| Patient 186 | 2 | 1 | 2 | 2 |
| Patient 187 | 1 | 1 | 2 | 1 |
| Patient 188 | 1 | 1 | 2 | 1 |
| Patient 189 | 1 | 1 | 2 | 1 |
| Patient 190 | 2 | 1 | 2 | 2 |

|             |   |   |   |   |
|-------------|---|---|---|---|
| Patient 191 | 1 | 1 | 2 | 1 |
| Patient 192 | 2 | 1 | 2 | 2 |
| Patient 193 | 1 | 1 | 2 | 1 |
| Patient 194 | 2 | 1 | 2 | 2 |
| Patient 195 | 1 | 1 | 2 | 1 |
| Patient 196 | 1 | 1 | 2 | 2 |
| Patient 197 | 1 | 1 | 2 | 1 |
| Patient 198 | 1 | 1 | 2 | 1 |
| Patient 199 | 1 | 1 | 2 | 1 |
| Patient 200 | 2 | 1 | 2 | 2 |
| Patient 201 | 1 | 1 | 2 | 1 |
| Patient 202 | 2 | 1 | 2 | 2 |
| Patient 203 | 1 | 1 | 2 | 1 |
| Patient 204 | 1 | 1 | 2 | 1 |
| Patient 205 | 1 | 1 | 2 | 2 |
| Patient 206 | 1 | 1 | 2 | 2 |
| Patient 207 | 1 | 1 | 2 | 1 |
| Patient 208 | 1 | 1 | 2 | 2 |
| Patient 209 | 1 | 1 | 2 | 1 |
| Patient 210 | 1 | 1 | 2 | 1 |
| Patient 211 | 1 | 1 | 2 | 1 |
| Patient 212 | 1 | 1 | 2 | 2 |
| Patient 213 | 1 | 1 | 2 | 1 |
| Patient 214 | 1 | 1 | 2 | 2 |
| Patient 215 | 1 | 1 | 1 | 2 |
| Patient 216 | 1 | 1 | 2 | 1 |
| Patient 217 | 1 | 1 | 2 | 1 |
| Patient 218 | 2 | 1 | 2 | 2 |
| Patient 219 | 1 | 1 | 2 | 1 |

|             |   |   |   |   |
|-------------|---|---|---|---|
| Patient 220 | 1 | 1 | 2 | 2 |
| Patient 221 | 1 | 1 | 2 | 1 |
| Patient 222 | / | / | / | / |
| Patient 223 | 1 | 1 | 2 | 1 |
| Patient 224 | / | / | / | / |
| Patient 225 | 1 | 1 | 2 | 2 |
| Patient 226 | 2 | 1 | 2 | 2 |
| Patient 227 | 1 | 1 | 2 | 2 |
| Patient 228 | 1 | 1 | 2 | 1 |
| Patient 229 | 1 | 2 | 1 | 1 |
| Patient 230 | 1 | 1 | 2 | 2 |
| Patient 231 | 1 | 1 | 2 | 2 |
| Patient 232 | 1 | 1 | 2 | 1 |
| Patient 233 | 1 | 1 | 2 | 1 |
| Patient 234 | 1 | 1 | 2 | 1 |
| Patient 235 | 1 | 1 | 2 | 2 |
| Patient 236 | 1 | 1 | 2 | 1 |
| Patient 237 | 1 | 1 | 2 | 2 |
| Patient 238 | 1 | 1 | 2 | 2 |
| Patient 239 | 1 | 1 | 2 | 1 |
| Patient 240 | 1 | 1 | 2 | 1 |
| Patient 241 | 1 | 2 | 2 | 2 |
| Patient 242 | 1 | 1 | 2 | 1 |
| Patient 243 | 1 | 1 | 2 | 2 |
| Patient 244 | / | / | / | / |
| Patient 245 | / | / | / | / |
| Patient 246 | 2 | 1 | 2 | 2 |
| Patient 247 | 2 | 1 | 2 | 2 |
| Patient 248 | 1 | 1 | 2 | 2 |

|             |   |   |   |   |
|-------------|---|---|---|---|
| Patient 249 | 1 | 1 | 2 | 1 |
| Patient 250 | 1 | 1 | 2 | 1 |
| Patient 251 | 1 | 1 | 2 | 1 |
| Patient 252 | 2 | 1 | 2 | 2 |
| Patient 253 | 2 | 2 | 2 | 2 |
| Patient 254 | 1 | 1 | 2 | 1 |
| Patient 255 | 1 | 1 | 2 | 1 |
| Patient 256 | 1 | 1 | 2 | 2 |
| Patient 257 | 1 | 1 | 2 | 1 |
| Patient 258 | 2 | 1 | 2 | 2 |
| Patient 259 | 1 | 1 | 2 | 1 |
| Patient 260 | 1 | 1 | 2 | 1 |
| Patient 261 | 1 | 1 | 2 | 1 |
| Patient 262 | 1 | 1 | 2 | 1 |
| Patient 263 | 1 | 1 | 2 | 1 |
| Patient 264 | 1 | 1 | 2 | 1 |
| Patient 265 | 1 | 1 | 2 | 1 |
| Patient 266 | 1 | 1 | 2 | 1 |
| Patient 267 | 1 | 1 | 2 | 1 |
| Patient 268 | 1 | 1 | 2 | 1 |
| Patient 269 | 1 | 1 | 2 | 1 |
| Patient 270 | 1 | 1 | 2 | 1 |
| Patient 271 | 1 | 1 | 1 | 1 |
| Patient 272 | 1 | 1 | 2 | 2 |
| Patient 273 | 1 | 1 | 2 | 2 |
| Patient 274 | 1 | 1 | 1 | 1 |
| Patient 275 | 1 | 1 | 2 | 1 |
| Patient 276 | 2 | 2 | 2 | 2 |
| Patient 277 | 1 | 1 | 2 | 2 |

|             |   |   |   |   |
|-------------|---|---|---|---|
| Patient 278 | 1 | 1 | 2 | 1 |
| Patient 279 | 1 | 1 | 2 | 1 |
| Patient 280 | 1 | 1 | 2 | 1 |
| Patient 281 | 1 | 1 | 2 | 1 |
| Patient 282 | 1 | 1 | 2 | 1 |
| Patient 283 | 1 | 1 | 2 | 1 |
| Patient 284 | 1 | 1 | 2 | 1 |
| Patient 285 | 1 | 1 | 2 | 2 |
| Patient 286 | 1 | 1 | 2 | 1 |
| Patient 287 | 1 | 1 | 1 | 2 |
| Patient 288 | 1 | 1 | 2 | 2 |
| Patient 289 | 1 | 1 | 2 | 1 |
| Patient 290 | 1 | 1 | 2 | 1 |
| Patient 291 | 1 | 1 | 2 | 1 |
| Patient 292 | 1 | 1 | 2 | 1 |
| Patient 293 | 1 | 1 | 2 | 1 |
| Patient 294 | 1 | 1 | 2 | 1 |
| Patient 295 | 1 | 1 | 2 | 1 |
| Patient 296 | 1 | 1 | 2 | 1 |
| Patient 297 | 1 | 1 | 2 | 1 |
| Patient 298 | 1 | 1 | 2 | 1 |
| Patient 299 | 1 | 1 | 2 | 1 |
| Patient 300 | 1 | 1 | 2 | 1 |
| Patient 301 | 1 | 1 | 2 | 1 |
| Patient 302 | / | / | / | / |
| Patient 303 | 1 | 1 | 2 | 1 |
| Patient 304 | 1 | 1 | 2 | 1 |
| Patient 305 | 1 | 1 | 2 | 2 |
| Patient 306 | 1 | 1 | 2 | 1 |

|             |   |   |   |   |
|-------------|---|---|---|---|
| Patient 307 | 1 | 1 | 2 | 1 |
| Patient 308 | 1 | 1 | 2 | 1 |
| Patient 309 | 2 | 1 | 1 | 2 |
| Patient 310 | 1 | 1 | 2 | 1 |
| Patient 311 | 1 | 1 | 2 | 1 |
| Patient 312 | 1 | 1 | 2 | 1 |
| Patient 313 | 1 | 1 | 2 | 1 |
| Patient 314 | 1 | 1 | 2 | 1 |
| Patient 315 | 1 | 1 | 2 | 1 |
| Patient 316 | 1 | 1 | 2 | 2 |
| Patient 317 | 1 | 1 | 2 | 1 |
| Patient 318 | 1 | 1 | 2 | 1 |
| Patient 319 | 1 | 1 | 2 | 1 |
| Patient 320 | 1 | 1 | 2 | 1 |
| Patient 321 | 1 | 1 | 2 | 1 |
| Patient 322 | 2 | 1 | 2 | 1 |
| Patient 323 | 1 | 1 | 2 | 1 |
| Patient 324 | 1 | 1 | 2 | 1 |
| Patient 325 | / | / | / | / |
| Patient 326 | 1 | 1 | 2 | 2 |
| Patient 327 | / | / | / | / |
| Patient 328 | 1 | 1 | 2 | 1 |
| Patient 329 | 1 | 1 | 2 | 1 |
| Patient 330 | 1 | 1 | 2 | 1 |
| Patient 331 | 1 | 1 | 2 | 1 |
| Patient 332 | 1 | 1 | 2 | 1 |
| Patient 333 | 1 | 1 | 2 | 1 |
| Patient 334 | 1 | 1 | 2 | 1 |
| Patient 335 | 1 | 1 | 2 | 1 |

|             |   |   |   |   |
|-------------|---|---|---|---|
| Patient 336 | 1 | 1 | 2 | 1 |
| Patient 337 | 1 | 1 | 2 | 1 |
| Patient 338 | 1 | 2 | 2 | 2 |
| Patient 339 | 1 | 1 | 2 | 2 |
| Patient 340 | / | / | / | / |
| Patient 341 | 1 | 1 | 2 | 1 |
| Patient 342 | 1 | 1 | 2 | 2 |
| Patient 343 | 1 | 1 | 2 | 1 |
| Patient 344 | 1 | 1 | 2 | 1 |
| Patient 345 | 1 | 1 | 2 | 1 |
| Patient 346 | 2 | 1 | 2 | 1 |
| Patient 347 | 1 | 1 | 2 | 1 |
| Patient 348 | 1 | 1 | 2 | 1 |
| Patient 349 | 1 | 1 | 2 | 1 |
| Patient 350 | 2 | 2 | 2 | 2 |
| Patient 351 | 1 | 1 | 2 | 1 |
| Patient 352 | 1 | 1 | 2 | 1 |
| Patient 353 | 1 | 1 | 2 | 2 |
| Patient 354 | 1 | 1 | 2 | 1 |
| Patient 355 | 1 | 1 | 2 | 2 |
| Patient 356 | 1 | 1 | 2 | 1 |
| Patient 357 | 2 | 2 | 2 | 2 |
| Patient 358 | 1 | 1 | 2 | 2 |
| Patient 359 | 1 | 1 | 2 | 1 |

---

\* indicates classification variables, including 1 = "YSE" and 2 = "NO".



**S5. Types and glycemic index in diabetics subjects.****Table S2.** Types and glycemic index in diabetics subjects.

| Patients    | Types | Fasting plasma glucose (mM) | HbA1c (%) | 2hPG (mM) |
|-------------|-------|-----------------------------|-----------|-----------|
| Patient 20  | T2DM  | 8                           | 9         | 11        |
| Patient 22  | T2DM  | 7.61                        | 5.3       | /         |
| Patient 24  | T2DM  | /                           | /         | 21.5      |
| Patient 25  | T2DM  | /                           | 7         | 13.08     |
| Patient 26  | T2DM  | /                           | 6.7       | 11.83     |
| Patient 34  | T2DM  | 4.75                        | 10.01     | /         |
| Patient 36  | T2DM  | 6.19                        | 7.1       | /         |
| Patient 38  | T2DM  | 5.35                        | 6.6       | /         |
| Patient 39  | T2DM  | 6.85                        | /         | /         |
| Patient 51  | T2DM  | 5.76                        | 6.2       | 17.63     |
| Patient 59  | T2DM  | 6.41                        | /         | 17.46     |
| Patient 72  | T2DM  | /                           | 9.3       | /         |
| Patient 75  | T2DM  | 11.88                       | 8.9       | /         |
| Patient 76  | T2DM  | 12.34                       | 8.6       | /         |
| Patient 77  | T2DM  | 10.05                       | 7.1       | /         |
| Patient 90  | T2DM  | /                           | 8.7       | /         |
| Patient 91  | T2DM  | 6.86                        | 6.7       | 23.74     |
| Patient 92  | T2DM  | 7.19                        | 6         | /         |
| Patient 95  | T2DM  | 5.33                        | 5.9       | /         |
| Patient 98  | T2DM  | 6.4                         | 6.9       | 16.49     |
| Patient 99  | T2DM  | 13.6                        | /         | 24        |
| Patient 100 | T2DM  | 8.65                        | 8         | /         |
| Patient 102 | T2DM  | 7.66                        | 6.7       | /         |
| Patient 115 | T2DM  | 12.62                       | 6.8       | 18.17     |
| Patient 121 | T2DM  | 10.75                       | 9.3       | /         |
| Patient 129 | T2DM  | /                           | /         | 12.94     |

|             |      |       |     |       |
|-------------|------|-------|-----|-------|
| Patient 138 | T2DM | 8.25  | 7.3 | 12    |
| Patient 141 | T2DM | /     | 6.1 | /     |
| Patient 150 | T2DM | /     | 8.3 | 16.47 |
| Patient 151 | T2DM | /     | /   | /     |
| Patient 155 | T2DM | 7.16  | 5.4 | /     |
| Patient 166 | T2DM | 6.5   | 7   | 8     |
| Patient 170 | T2DM | 7.36  | 6.4 | /     |
| Patient 177 | T2DM | 9.02  | 6.6 | 17.35 |
| Patient 179 | T2DM | 7.19  | 7.4 | /     |
| Patient 188 | T2DM | 9.18  | 7.3 | /     |
| Patient 202 | T2DM | 8.91  | 7.3 | /     |
| Patient 210 | T2DM | 6.38  | 9.4 | /     |
| Patient 215 | T2DM | 14.25 | 9   | /     |
| Patient 216 | T2DM | 6.15  | 7.6 | /     |
| Patient 229 | T2DM | 6.6   | 7.7 | /     |
| Patient 231 | T2DM | /     | /   | 14.8  |
| Patient 241 | T2DM | 5.88  | /   | 12    |
| Patient 242 | T2DM | 8.45  | 7   | /     |
| Patient 244 | T2DM | 8.19  | /   | 15.94 |
| Patient 254 | T2DM | 9     | 6.5 | /     |
| Patient 256 | T2DM | 4.81  | /   | /     |
| Patient 265 | T2DM | 8.14  | 7.9 | /     |
| Patient 267 | T2DM | 7.19  | /   | 11.31 |
| Patient 271 | T2DM | /     | 7.5 | 12.72 |
| Patient 273 | T2DM | 9.46  | 8.9 | /     |
| Patient 274 | T2DM | /     | 7   | 21.82 |
| Patient 279 | T2DM | /     | /   | 11.67 |
| Patient 280 | T2DM | 7.1   | /   | /     |
| Patient 282 | T2DM | 5.45  | 6.4 | /     |

|             |      |       |      |       |
|-------------|------|-------|------|-------|
| Patient 285 | T2DM | /     | 9.1  | 9.55  |
| Patient 287 | T2DM | 13.57 | 8.4  | /     |
| Patient 298 | T2DM | 10.39 | 7.8  | /     |
| Patient 299 | T2DM | /     | 7.4  | 19.29 |
| Patient 305 | T2DM | /     | 6.3  | /     |
| Patient 306 | T2DM | /     | /    | /     |
| Patient 307 | T2DM | 11.48 | /    | /     |
| Patient 308 | T2DM | 5.02  | 5.9  | /     |
| Patient 309 | T2DM | 9.36  | 7.5  | /     |
| Patient 316 | T2DM | 7.58  | /    | /     |
| Patient 321 | T2DM | 5.29  | 5.7  | /     |
| Patient 325 | T2DM | 5.75  | 6.3  | /     |
| Patient 328 | T2DM | /     | /    | /     |
| Patient 331 | T2DM | 11.7  | /    | /     |
| Patient 332 | T2DM | /     | 8.2  | 17.82 |
| Patient 337 | T2DM | 4.76  | 10.9 | /     |
| Patient 343 | T2DM | /     | 8.6  | /     |
| Patient 355 | T2DM | /     | 8    | 14.09 |
| Patient 356 | T2DM | 5.43  | /    | /     |
| Patient 357 | T2DM | /     | 10.3 | /     |
| Patient 358 | T2DM | 7.56  | 8    | /     |

---
